# Supplementary material
Source: Research Square preprint supplement (doi:10.21203/rs.3.rs-9091387/v1)
Supplement: Supplementary file 1 [file e0544757e4a9476d111f5edc.xlsx]

## Sheet: Supplement_table_1
Supplementary Table 1. Variables included in the analyses
						Comorbidities			Concomitant drug				Underlying pulmonary disease		Bacterial strain		CAT score (Baseline)									CAT score (at 6 months)									CAT score (at 12 months)									Radiographical pattern				Chest CT score
		Sex; 0:male	Smoking; 0;never	Stature	Body weight	Rheumatoid arthritis	Current malignancy	Past malignancy	Corticosteroids	Biologic agent	Immunosuppressant	Chemotherapy	Interstitial pneumonia	Emphysema	M. avium	M. intracellulare	Cough	Sputum	Chest tightness	Breathlessness	Limited activities	Confidence leaving home	Sleeplessness	Energy	Total	Cough	Sputum	Chest tightness	Breathlessness	Limited activities	Confidence leaving home	Sleeplessness	Energy	Total	Cough	Sputum	Chest tightness	Breathlessness	Limited activities	Confidence leaving home	Sleeplessness	Energy	Total	NBE type	FC type	Cavitary NBE type	Unclassifiable	Right-upper
ID	Age, years																																															N1	I2
1	57	0	0	1.55	37.4	0	0	0	0	0	0	0	0	0	1	0	1	1	1	2	0	0	1	4	10	1	1	0	0	0	0	1	1	4	2	1	1	1	0	0	1	2	8	1	0	0	0	0	0
2	62	0	0	1.55	39	0	0	0	0	0	0	0	0	0	1	0	3	1	1	2	1	1	1	3	13	2	1	1	1	0	0	2	1	8	2	2	0	0	0	0	2	1	7	1	0	0	0	0	0
3	62	0	0	1.62	57.7	0	0	0	0	0	0	0	0	0	1	0	2	1	0	2	0	0	0	1	6	1	1	1	2	0	1	0	1	7	1	1	1	1	0	1	2	1	8	1	0	1	0	0	0
4	50	0	0	1.65	54	0	0	0	0	0	0	0	0	0	1	0	0	0	0	2	0	0	0	1	3	4	0	0	2	0	0	0	1	7	1	0	0	1	0	0	0	1	3	1	0	0	0	1	0
5	72	0	1	1.57	69.6	0	0	0	0	0	0	0	0	0	1	0	0	1	1	2	0	0	1	1	6	1	1	0	3	0	1	0	1	7	1	1	2	1	1	1	2	2	11	0	0	1	0	1	1
6	69	0	0	1.59	38	0	1	0	0	0	0	1	0	1	0	1	3	3	4	3	3	4	2	1	23	3	3	3	3	3	3	1	3	22	2	2	3	3	2	3	2	2	19	0	0	1	0	1	0
7	75	0	0	1.59	37	0	0	1	0	0	0	0	0	1	0	1	5	4	4	5	4	5	3	2	32	4	4	4	4	4	4	1	4	29	4	3	4	4	4	4	3	4	30	0	0	1	0	1	0
8	75	0	0	1.55	48	0	0	0	0	0	0	0	0	0	1	0	1	1	0	1	0	0	0	1	4	1	1	0	1	0	0	0	0	3	1	0	0	1	0	0	0	1	3	1	0	0	0	2	0
9	71	0	0	1.49	35.7	1	0	0	1	1	1	0	0	0	1	0	3	3	3	5	0	0	0	0	14	3	1	0	5	0	0	0	0	9	3	1	1	5	0	1	0	1	12	1	0	0	0	2	0
10	68	0	1	1.54	48.9	0	0	0	0	0	0	0	0	0	1	0	4	3	0	2	1	3	3	1	17	2	1	0	1	0	1	1	0	6	3	3	1	2	0	3	2	1	15	0	0	1	0	0	0
11	83	0	0	1.49	40.7	0	0	0	0	0	0	0	0	0	0	1	2	2	0	1	0	1	0	0	6	2	1	2	2	1	1	1	2	12	1	1	1	1	1	1	1	1	8	0	1	0	0	0	1
12	64	0	0	1.51	41	0	0	0	0	0	0	0	0	0	1	0	1	2	0	1	0	0	0	1	5	0	1	0	0	0	0	0	0	1	0	0	0	1	0	0	0	0	1	1	0	0	0	0	0
13	69	0	0	1.51	41	0	0	0	0	0	0	0	0	0	1	0	1	1	0	1	0	0	0	1	4	1	0	0	1	0	0	0	1	3	1	1	1	1	0	0	0	1	5	1	0	0	0	0	0
14	74	0	1	1.52	53	0	0	0	0	0	0	0	1	0	1	0	0	0	0	0	0	0	0	0	0	0	0	0	0	0	0	0	0	0	0	0	0	0	0	0	0	0	0	1	0	0	0	1	0
15	66	0	0	1.47	42	0	0	0	0	0	0	0	0	0	0	1	5	5	1	2	0	0	2	1	16	5	4	2	1	0	0	0	0	12	5	4	1	1	0	1	0	1	13	1	0	0	0	2	0
16	62	0	0	1.51	50	1	1	0	1	0	0	0	1	0	1	0	0	1	0	0	0	0	0	0	1	0	1	0	2	0	1	1	1	6	0	0	0	2	0	1	1	1	5	0	0	0	1	1	0
17	72	0	0	1.57	48	0	0	0	0	0	0	0	0	0	1	0	3	2	2	1	2	1	4	3	18	0	0	0	0	0	0	2	2	4	0	0	2	1	0	0	3	3	9	1	0	0	0	1	0
18	64	0	0	1.65	40	0	0	0	0	0	0	0	0	0	0	1	4	4	4	5	4	5	4	4	34	3	4	4	4	3	5	3	3	29	2	4	0	4	3	4	3	4	24	0	0	1	0	0	0
19	61	0	0	1.66	51	0	0	0	0	0	0	0	0	1	0	1	1	1	1	1	1	1	1	1	8	0	0	1	1	2	1	2	2	9	0	0	1	1	0	0	0	1	3	0	0	1	0	0	0
20	65	0	0	1.66	45	0	0	0	0	0	0	0	0	1	0	1	1	1	1	1	1	1	1	2	9	1	1	1	2	1	1	1	2	10	1	1	1	2	1	1	1	1	9	0	0	1	0	0	0
21	47	0	0	1.53	45	0	0	0	0	0	0	0	0	0	1	0	0	0	0	0	0	0	1	1	2	1	1	1	0	0	0	2	0	5	0	0	0	0	0	0	0	0	0	1	0	0	0	0	0
22	72	0	0	1.475	37.9	1	0	0	1	0	1	0	0	0	1	0	1	5	0	0	0	0	0	2	8	0	1	0	3	2	0	0	0	6	1	1	0	1	0	0	0	0	3	1	0	0	0	2	0
23	71	0	0	1.6	41	0	0	0	0	0	0	0	0	0	1	0	1	1	0	0	0	1	3	1	7	1	1	0	1	1	1	2	3	10	2	1	1	1	1	1	3	1	11	1	0	0	0	0	0
24	78	0	0	1.49	45	1	0	0	0	0	1	0	0	0	1	0	4	0	0	1	0	0	0	1	6	1	0	1	1	0	0	0	1	4	1	0	1	1	0	0	0	1	4	1	0	0	0	0	0
25	39	0	1	1.52	48.5	1	0	0	1	1	1	0	0	0	1	0	1	1	0	2	0	1	1	2	8	1	1	1	2	0	0	1	1	7	1	1	1	2	0	1	0	1	7	1	0	0	0	1	0
26	71	0	0	1.55	46.8	0	0	0	0	0	0	0	0	0	1	1	1	1	0	2	0	0	3	3	10	1	0	1	3	0	0	3	2	10	1	0	1	2	0	0	3	2	9	1	0	0	0	1	0
27	64	0	1	1.53	40.9	1	0	0	1	0	1	0	0	0	0	1	0	0	0	0	0	0	0	0	0	0	0	0	0	0	0	1	0	1	0	0	0	0	0	0	0	0	0	1	0	0	0	1	0
28	78	0	1	1.7	50	0	0	1	0	0	0	0	0	0	1	0	1	1	1	1	0	1	1	1	7	1	1	0	1	0	0	0	0	3	3	3	2	2	3	2	2	2	19	0	0	1	0	1	0
29	59	0	0	1.46	40	0	0	0	0	0	0	0	0	0	1	0	3	4	1	1	1	3	3	3	19	2	1	1	3	1	1	1	1	11	3	3	2	2	3	2	2	2	19	1	0	0	0	1	0
30	60	0	1	1.62	45.5	0	0	0	0	0	0	0	0	0	1	0	2	3	2	2	1	2	2	2	16	3	3	1	2	1	1	3	2	16	3	3	2	3	2	2	3	2	20	1	0	0	0	1	0
31	67	0	1	1.53	45	0	0	0	0	0	0	0	0	0	1	0	3	2	0	0	0	0	1	1	7	1	2	0	0	0	0	2	1	6	2	1	0	0	0	0	0	0	3	1	0	0	0	1	0
32	63	0	0	1.65	52	0	0	0	0	0	0	0	0	0	0	1	3	4	2	4	3	3	2	3	24	1	1	1	1	1	1	1	2	9	2	2	0	0	1	0	0	2	7	1	0	0	0	0	0
33	83	0	0	1.44	30	0	1	0	0	0	0	0	0	0	0	1	3	3	0	1	0	0	3	3	13	2	2	0	2	1	1	3	2	13	2	1	1	2	1	1	2	2	12	0	0	1	0	0	0
34	79	0	0	1.53	42	1	0	0	0	0	1	0	0	0	1	0	5	5	1	1	0	0	1	1	14	1	0	0	0	0	0	0	2	3	1	0	0	0	0	0	0	2	3	0	0	1	0	1	0
35	72	0	0	1.53	54	0	0	1	0	0	0	0	0	0	1	0	2	2	0	0	0	0	0	0	4	2	2	0	0	0	0	0	0	4	3	3	0	0	0	0	0	0	6	1	0	0	0	3	0
36	66	0	0	1.6	49.3	1	0	0	0	0	1	0	0	0	1	0	2	0	0	1	0	0	0	1	4	2	0	0	0	0	0	1	1	4	3	0	0	1	0	0	1	1	6	1	0	0	0	1	0
37	70	0	0	1.6	45	1	0	0	0	0	1	0	0	0	1	0	2	0	0	1	1	1	1	1	7	3	0	0	1	1	1	1	1	8	2	0	0	1	0	1	2	1	7	1	0	0	0	1	0
38	41	0	0	1.52	44	0	0	0	0	0	0	0	0	0	1	0	1	0	0	1	0	0	0	1	3										0	1	0	0	0	0	0	0	1	1	0	0	0	0	0
39	64	0	0	1.58	43	0	0	0	0	0	0	0	0	0	1	0	3	3	3	3	0	0	2	2	16	1	1	2	2	0	0	3	2	11	1	1	1	2	0	0	2	2	9	1	0	0	0	1	0
40	52	0	0	1.45	25.7	0	0	0	0	0	0	0	0	1	1	0	1	1	0	5	2	3	2	4	18	0	0	0	1	0	0	2	2	5	1	0	0	1	0	0	1	1	4	0	1	0	0	0	1
41	74	1	0	1.62	52	0	0	0	0	0	0	0	0	0	1	0	1	3	2	2	1	1	1	2	13	0	0	0	1	0	0	1	0	2	0	0	0	1	0	0	0	0	1	1	0	0	0	1	0
42	76	0	0	1.53	43	1	0	1	0	0	1	0	0	0	1	0	0	0	0	0	0	0	0	0	0	1	0	0	0	0	0	0	0	1	1	3	0	0	0	0	0	0	4	0	0	1	0	1	0
43	81	0	0	1.53	50	0	0	0	0	0	0	0	1	0	1	0	1	1	0	2	1	1	4	4	14	0	1	1	2	1	0	1	0	6	2	0	0	2	0	3	1	3	11	0	1	0	0	1	0
44	75	0	0	1.58	50	0	0	0	0	0	0	0	0	0	0	1	2	1	0	0	0	1	1	1	6	4	3	2	2	2	3	3	3	22	5	4	2	2	2	3	2	4	24	1	0	0	0	1	0
45	59	0	0	1.65	50	0	0	0	0	0	0	0	0	0	1	0	3	2	0	0	0	0	0	0	5	0	0	0	0	0	0	0	0	0	0	0	0	0	0	0	2	0	2	1	0	0	0	1	0
46	62	0	1	1.65	50	0	0	0	0	0	0	0	0	1	1	0	0	1	1	2	0	0	1	1	6	0	0	1	1	0	0	1	1	4	0	0	1	1	0	0	1	1	4	1	0	0	0	2	1
47	72	0	0	1.43	46	0	0	0	0	0	0	0	0	0	1	0	5	3	1	5	0	1	3	0	18	1	2	1	4	0	1	1	0	10	5	4	4	5	3	2	3	1	27	1	0	0	0	2	0
48	43	0	1	1.65	62	0	0	0	0	0	0	0	0	0	1	0	1	2	0	0	0	0	1	0	4	0	0	0	0	0	0	2	2	4	0	0	0	0	0	0	0	0	0	1	0	0	0	1	0
49	71	0	1	1.57	47	0	0	0	0	0	0	0	0	0	1	0	4	3	3	3	1	2	3	3	22	2	3	2	3	1	1	3	2	17	5	3	3	1	1	2	3	3	21	0	0	1	0	1	0
50	84	1	0	1.68	60	0	0	0	0	0	0	0	0	0	1	0	2	1	0	1	0	1	0	1	6	2	0	0	0	0	0	2	2	6	0	2	0	0	0	0	1	2	5	0	0	1	0	0	0
51	56	0	0	1.5	44	0	0	0	0	0	0	0	0	0	0	1	3	2	2	3	1	3	3	3	20	2	2	1	1	0	0	3	4	13	2	2	2	2	2	2	3	3	18	1	0	0	0	1	0
52	53	0	1	1.55	47	0	0	1	0	0	0	0	0	0	1	0	0	0	0	1	0	0	0	0	1	0	0	0	0	0	0	0	0	0	0	0	0	0	0	0	0	0	0	1	0	0	0	0	0
53	67	0	0	1.55	40	0	0	0	0	0	0	0	0	0	1	0	2	2	0	0	0	0	0	2	6	3	2	2	2	1	1	3	2	16	3	3	2	2	0	0	1	1	12	0	0	1	0	2	0
54	82	0	0	1.46	45	0	0	0	0	0	0	0	0	0	1	0	3	3	0	0	0	0	0	0	6	2	1	0	0	0	0	0	0	3	3	3	1	1	1	1	1	3	14	0	1	0	0	1	0
55	71	0	0	1.47	40	0	0	0	0	0	0	0	0	0	1	0	1	1	1	4	4	3	3	3	20	1	2	0	3	3	3	3	3	18	0	0	1	4	0	2	3	1	11	1	0	0	0	0	0
56	54	0	0	1.54	43	0	0	0	0	0	0	0	0	0	1	0	0	0	0	2	0	0	0	2	4	2	0	0	1	0	0	0	0	3	2	0	0	0	0	0	0	0	2	1	0	0	0	0	0
57	64	0	0	1.63	64	0	0	0	0	0	0	0	0	0	1	0	3	1	1	1	1	1	1	1	10	3	2	2	3	0	0	0	1	11	2	1	1	1	0	0	0	1	6	1	0	0	0	0	0
58	77	1	0	1.67	53	0	0	0	0	0	0	0	0	1	1	0	3	2	1	5	3	3	0	2	19	3	3	4	5	4	4	0	3	26	3	3	1	5	3	4	0	3	22	0	0	1	0	2	0
59	68	0	0	1.61	44.9	0	0	0	0	0	0	0	0	0	0	1	3	2	0	1	0	0	0	3	9	0	0	0	1	0	0	3	3	7	1	1	1	1	1	1	1	1	8	1	0	0	0	1	1
60	52	1	1	1.75	56	0	0	0	0	0	0	0	0	1	1	0	3	1	2	3	1	0	0	2	12	4	3	3	4	2	3	1	3	23	3	3	3	4	1	2	0	3	19	1	0	1	0	0	1
61	77	1	1	1.61	60	0	0	0	0	0	0	0	1	0	1	0	0	0	3	3	0	0	0	0	6	0	0	0	2	0	0	0	0	2	0	0	0	2	0	0	0	0	2	1	0	0	0	0	0
62	60	0	0	1.51	42	0	0	1	0	0	0	0	0	0	0	1	2	1	0	1	0	0	3	3	10	1	1	0	1	0	1	3	1	8	3	1	2	3	0	1	2	2	14	1	0	0	0	1	0
63	71	0	1	1.53	47	0	0	0	0	0	0	0	0	0	1	0	2	3	1	1	0	0	0	1	8	0	0	0	1	0	0	0	0	1	0	0	0	1	0	0	0	1	2	1	0	0	0	0	0
64	76	0	0	1.55	35	0	0	0	0	0	0	0	0	0	1	0	2	2	5	5	1	1	3	1	20	1	1	3	2	4	0	1	2	14	1	1	1	2	1	2	2	2	12	1	0	0	0	0	0
65	75	0	0	1.64	50	0	0	0	0	0	0	0	0	0	0	1	4	4	0	0	0	0	0	0	8	5	3	3	5	0	2	2	2	22	4	4	4	4	3	4	2	4	29	1	0	0	0	1	0
66	60	0	0	1.61	42	0	0	0	0	0	0	0	0	0	1	0	3	2	1	1	0	0	0	1	8	3	4	1	1	1	1	1	2	14	3	2	1	1	0	0	0	4	11	1	0	0	0	1	0
67	70	0	0	1.53	44	0	0	0	0	0	0	0	0	0	1	0	2	0	0	0	0	0	2	1	5	1	0	0	0	0	0	2	0	3	1	1	0	0	0	0	0	2	4	0	0	1	0	1	0
68	58	1	1	1.65	62	0	0	0	0	0	0	0	0	0	1	0	4	4	1	3	2	1	1	2	18	4	2	1	1	0	0	2	3	13	3	1	1	1	1	1	3	4	15	0	0	1	0	2	0
69	62	0	1	1.63	40	0	0	0	0	0	0	0	0	0	1	0	2	2	0	0	0	0	2	0	6	1	1	0	0	0	0	4	1	7	2	2	0	0	0	0	2	0	6	1	0	0	0	2	0
70	62	0	0	1.47	46	0	0	0	0	0	0	0	0	0	1	0	1	0	0	4	0	0	1	1	7	0	0	0	4	0	0	1	1	6	1	0	0	4	0	0	0	1	6	1	0	0	0	0	0
71	75	1	0	1.67	52	0	0	0	0	0	0	0	1	0	1	0	1	3	1	2	0	2	3	3	15	1	2	1	3	0	1	3	2	13	2	2	1	3	0	2	1	2	13	1	0	0	0	1	0
72	62	0	1	1.58	54	0	0	0	0	0	0	0	0	0	1	0	3	3	3	3	1	4	3	3	23	2	2	2	2	0	0	3	2	13	1	1	3	3	5	5	3	3	24	1	0	0	0	0	0
73	69	0	0	1.6	49	0	0	0	0	0	0	0	0	0	0	1	1	1	1	2	0	4	0	1	10	1	3	2	2	0	3	1	3	15	1	3	2	3	0	1	0	1	11	1	0	0	0	1	0
74	57	0	0	1.64	60	0	0	0	0	0	0	0	0	0	0	1	1	1	1	0	0	0	4	3	10	4	2	2	2	0	2	3	3	18	2	2	0	2	1	3	3	2	15	1	0	0	0	1	0
75	63	0	1	1.51	34	0	0	1	0	0	0	0	0	0	1	1	3	3	2	4	0	0	0	1	13	3	2	3	3	0	0	2	1	14	2	3	3	3	0	0	0	0	11	1	0	0	0	0	0
76	72	0	1	1.53	42.5	0	0	0	0	0	0	0	0	0	1	0	2	3	0	0	0	1	5	0	11	0	0	0	0	0	0	1	0	1	0	0	0	0	0	0	0	0	0	0	0	1	0	0	1
77	57	0	0	1.59	57	1	0	0	0	1	1	0	0	0	1	0	4	4	1	2	0	1	2	3	17	4	3	2	4	2	2	2	2	21	4	3	2	4	1	3	2	3	22	1	0	0	0	0	0
78	70	0	0	1.6	56	0	0	1	0	0	0	0	0	0	0	1	2	1	1	2	1	2	1	1	11	1	2	1	1	0	0	1	1	7	2	3	3	2	0	1	3	2	16	1	0	0	0	2	0
79	69	0	1	1.58	48	0	0	0	0	0	0	0	0	0	1	0	3	3	0	2	1	2	4	3	18	1	3	1	2	0	3	2	3	15	2	5	1	3	0	2	3	3	19	0	0	1	0	0	1
80	74	0	0	1.61	39	0	0	0	0	0	0	0	0	0	0	1	3	1	1	2	0	1	1	0	9	2	2	1	0	0	0	0	0	5	0	0	1	1	0	0	0	0	2	0	0	1	0	0	0
81	50	0	0	1.62	50.6	0	0	0	0	0	0	0	0	0	0	1	2	3	0	1	1	0	2	3	12	0	1	0	0	0	1	1	3	6	0	1	0	0	0	0	3	2	6	1	0	0	0	1	0
82	66	0	1	1.56	49	0	0	0	0	0	0	0	0	0	1	0	1	1	0	0	0	0	0	0	2	0	0	0	0	0	0	0	0	0	0	0	0	0	0	0	0	0	0	1	0	0	0	1	0
83	47	0	0	1.57	47	0	0	0	0	0	0	0	0	0	0	1	2	2	3	5	1	4	4	1	22	1	1	1	4	0	0	0	1	8	1	1	1	4	0	0	0	1	8	1	0	0	0	1	0
84	88	0	0	1.49	49	0	0	0	0	0	0	0	0	0	1	0	4	3	3	3	3	3	3	3	25	0	1	0	0	0	0	2	2	5	0	0	0	1	0	3	2	4	10	1	0	0	0	2	0
85	78	0	0	1.49	41	0	0	0	1	0	0	0	0	0	1	0	1	1	0	0	0	0	0	0	2	1	1	1	1	1	1	1	1	8	0	1	0	0	0	0	2	2	5	1	0	0	0	1	0
86	83	0	0	1.53	31.3	0	0	0	0	0	0	0	0	0	1	0	0	0	0	0	0	0	0	0	0	0	0	0	0	0	0	0	0	0	0	0	0	0	0	0	0	0	0	1	0	0	0	0	0
87	81	1	1	1.6	59	0	1	0	0	0	0	0	0	0	1	0	2	2	2	2	0	0	3	2	13	1	0	0	4	0	0	0	0	5	1	0	0	2	0	0	0	0	3	1	0	0	0	2	1
88	37	0	0	1.55	45	0	0	0	0	0	0	0	0	0	1	0	1	1	0	0	0	0	0	0	2	0	0	0	1	0	0	0	1	2	0	0	0	1	0	0	0	0	1	1	0	0	0	0	1
89	77	0	0	1.43	40	0	0	0	0	0	0	0	0	0	1	0	5	3	5	5	1	4	3	3	29	5	5	5	5	0	5	3	5	33	5	3	5	5	3	5	3	3	32	0	0	1	0	2	1
90	66	1	1	1.76	60	0	0	0	0	0	0	0	0	0	1	0	0	1	0	0	0	0	0	0	1	0	0	0	0	0	0	0	0	0	0	0	0	0	0	0	0	0	0	0	0	1	0	1	0
91	50	1	1	1.72	60	0	0	0	0	0	0	0	0	1	0	1	3	3	1	1	0	0	0	2	10	1	0	2	2	0	0	0	0	5	1	1	1	2	0	0	0	0	5	0	1	0	0	0	1
92	73	0	0	1.57	43	0	0	0	0	0	0	0	0	0	1	0	2	3	3	3	3	4	4	4	26	1	2	2	1	2	1	2	3	14	1	2	2	2	2	3	2	3	17	1	0	0	0	1	0
93	61	0	0	1.54	49	0	0	0	0	0	0	0	0	0	1	0	5	1	0	3	0	0	0	1	10	3	1	1	4	0	0	2	1	12	4	0	1	4	0	0	0	1	10	1	0	0	0	1	0
94	62	0	0	1.55	42	0	0	0	0	0	0	0	0	0	1	0	2	2	3	4	0	0	0	2	13	1	1	2	2	1	1	2	2	12	0	0	1	0	0	0	0	1	2	1	0	0	0	1	0
95	72	0	0	1.55	40	0	0	0	0	0	0	0	0	0	0	1	4	4	1	5	2	4	1	2	23	5	3	1	4	0	4	2	2	21	5	3	3	5	1	4	3	4	28	0	0	1	0	1	0
96	60	0	0	1.51	35	0	0	1	0	0	0	0	0	0	0	1	3	5	3	3	2	1	1	1	19	1	1	1	1	0	0	2	2	8	3	3	3	1	0	0	3	2	15	1	0	0	0	0	0
97	69	0	0	1.51	43	0	0	0	0	0	0	0	0	0	1	0	1	0	0	0	0	0	2	1	4	0	0	0	0	0	2	2	1	5	1	0	0	0	0	1	3	1	6	1	0	0	0	1	0
98	69	0	1	1.54	51	0	0	0	0	0	0	0	1	0	1	0	5	3	4	4	0	3	1	2	22	3	3	3	3	0	3	2	2	19	2	1	3	1	0	1	1	0	9	0	0	0	1	0	0
99	59	0	1	1.53	47	0	0	0	0	0	0	0	0	0	1	0	0	0	0	1	0	0	0	1	2	0	0	0	2	0	0	0	0	2	0	0	0	4	0	0	0	2	6	1	0	0	0	0	0
100	70	0	0	1.61	48	1	0	0	1	1	1	0	0	0	1	0	0	0	0	0	0	0	3	0	3	0	0	0	0	0	0	3	0	3	0	0	0	0	0	0	3	0	3	1	0	0	0	1	0
101	53	1	1	1.62	52	0	0	0	0	0	0	0	0	1	1	1	1	0	2	4	1	1	1	1	11	0	0	3	3	0	0	0	1	7	0	0	1	1	0	0	0	0	2	1	0	0	0	1	0
102	62	1	0	1.85	56	0	0	0	0	0	0	0	0	0	1	0	5	5	3	2	2	3	4	4	28	4	4	4	3	3	4	3	3	28	4	4	4	3	2	3	4	3	27	0	0	1	0	3	0
103	63	0	0	1.53	54	1	0	0	0	1	1	0	0	0	1	0	1	0	0	0	0	0	0	1	2	1	1	0	0	0	1	0	0	3	1	1	0	0	0	0	0	0	2	1	0	0	0	1	0
104	55	0	0	1.67	53	0	1	0	0	0	0	1	0	0	1	0	2	1	1	2	0	1	2	1	10	1	1	3	3	1	2	3	1	15	1	1	1	2	1	1	2	2	11	1	0	0	0	1	0
105	83	0	1	1.45	31	1	0	0	1	0	1	0	0	0	0	1	2	1	0	0	0	0	1	3	7	1	1	0	0	0	0	1	1	4	2	1	0	0	0	0	2	2	7	1	0	0	0	2	0
106	77	0	0	1.56	45	0	0	0	0	0	0	0	0	0	0	1	1	1	0	0	0	0	1	1	4	0	0	1	0	0	0	1	1	3	1	1	1	1	1	1	1	2	9	1	0	0	0	0	0
107	61	0	0	1.65	48	0	0	0	0	0	0	0	0	0	1	0	0	0	0	1	0	0	0	0	1	1	2	1	1	1	1	1	1	9	1	0	0	1	1	1	4	4	12	1	0	0	0	1	1
108	58	0	0	1.54	45	0	0	0	0	0	0	0	0	0	1	0	4	4	2	3	2	1	2	2	20	1	1	2	2	1	1	2	2	12	2	2	1	2	1	0	0	2	10	1	0	0	0	0	0
109	71	0	0	1.54	45	0	0	0	0	0	0	0	0	0	1	0	5	2	3	2	3	5	3	4	27	5	0	3	4	0	0	0	1	13	2	0	2	1	0	1	0	0	6	0	0	1	0	1	0
110	68	0	1	1.62	48	0	0	0	0	0	0	0	0	0	1	0	2	1	0	1	0	0	0	1	5	1	1	0	1	0	1	0	1	5	1	1	0	1	0	0	0	1	4	1	0	0	0	1	0
111	64	0	0	1.53	50	0	0	1	0	0	0	0	0	0	1	0	0	0	0	3	0	0	0	3	6	0	0	0	0	0	0	4	0	4	0	0	0	0	0	0	0	0	0	1	0	0	0	1	0
112	80	0	0	1.52	38	0	0	0	0	0	0	0	0	0	1	0	0	0	1	1	0	1	0	0	3	0	0	0	1	1	1	4	1	8	0	1	0	2	2	2	2	2	11	0	0	1	0	0	0
113	79	0	0	1.54	46	0	0	0	0	0	0	0	0	0	1	0	5	4	1	2	2	1	2	1	18	3	4	1	1	1	1	2	1	14	5	3	1	1	1	1	3	1	16	1	0	0	0	0	0
114	57	0	0	1.53	37	0	0	0	0	0	0	0	0	0	1	1	1	2	2	2	1	1	1	2	12	2	1	1	2	1	0	2	2	11	4	4	3	4	1	1	1	2	20	0	0	1	0	1	1
115	47	0	0	1.63	56	0	0	0	0	0	0	0	0	0	0	1	4	3	4	5	0	0	3	3	22	1	0	4	5	0	1	4	3	18	2	0	2	5	1	1	3	3	17	1	0	0	0	0	0
116	63	0	0	1.64	45	0	0	0	0	0	0	0	0	0	1	0	2	2	2	3	2	2	3	2	18	1	2	0	2	0	0	2	2	9	1	1	0	2	0	0	3	4	11	1	0	0	0	0	0
117	58	0	0	1.59	59	0	0	0	0	0	0	0	0	0	1	0	4	4	4	4	4	2	1	3	26	2	2	1	1	1	2	3	3	15	1	0	1	1	0	0	0	0	3	1	0	0	0	0	0
118	70	0	0	1.61	59	0	0	0	0	0	0	0	0	0	1	0	1	1	0	1	1	0	2	1	7	2	1	0	1	1	0	2	1	8	1	0	0	1	1	0	1	1	5	0	0	1	0	0	0
119	56	0	0	1.52	42	0	0	0	0	0	0	0	0	0	1	0	1	2	2	3	4	0	2	3	17	1	1	2	5	1	2	2	3	17	1	1	1	3	1	1	2	1	11	1	0	0	0	0	0
120	61	1	1	1.77	65	0	0	0	0	0	0	0	0	0	1	0	0	0	0	0	0	0	4	1	5	1	1	0	1	0	0	4	1	8	0	1	0	1	1	1	3	2	9	1	0	0	0	1	0
121	72	0	0	1.5	35	0	0	0	0	0	0	0	0	0	0	1	1	1	0	0	0	0	0	0	2	0	0	0	0	0	1	1	1	3	0	0	0	0	0	0	0	0	0	0	0	1	0	1	0
122	79	0	0	1.51	38	0	0	0	0	0	0	0	0	0	0	1	5	3	2	5	4	5	3	4	31	5	2	2	3	2	3	1	3	21	3	1	2	3	2	4	1	1	17	0	0	1	0	0	0
123	63	0	0	1.65	50	1	0	0	1	0	0	0	0	0	1	0	1	5	1	2	0	0	0	2	11	1	2	0	1	0	1	0	2	7	1	3	1	1	1	2	0	3	12	1	0	0	0	2	0
124	65	0	0	1.58	40	0	0	0	0	0	0	0	0	0	1	0	1	0	2	2	1	1	1	1	9	1	0	1	2	0	0	1	1	6	0	0	1	1	0	0	1	1	4	1	0	0	0	1	0
125	68	0	0	1.5	35	0	0	0	0	0	0	0	0	0	1	0	1	0	1	1	0	1	0	2	6	1	2	1	1	1	1	1	2	10	1	1	1	2	0	0	1	1	7	1	0	0	0	0	0
126	80	1	0	1.63	47	0	0	0	0	0	0	0	0	0	1	0	2	2	1	1	0	0	0	1	7	1	1	2	3	3	3	0	2	15	3	0	2	2	1	0	0	1	9	1	0	0	0	2	0
127	54	0	0	1.72	57	0	0	0	0	0	0	0	0	0	1	0	5	3	3	4	1	0	0	2	18	4	4	1	1	0	0	0	0	10	3	1	1	3	0	0	0	0	8	1	0	0	0	0	0
128	72	0	0	1.54	37	0	0	0	0	0	0	0	0	0	1	0	5	0	0	0	0	0	0	0	5	0	0	0	0	0	0	0	0	0	0	0	0	0	0	0	0	0	0	0	0	1	0	0	0
129	74	0	0	1.69	52	0	0	0	0	0	0	0	0	0	1	0	0	0	0	0	0	0	0	2	2	0	0	0	0	0	0	1	1	2	0	0	0	0	0	0	0	0	0	1	0	0	0	0	0
130	64	0	0	1.5	42	0	0	0	0	0	0	0	0	0	1	0	4	4	3	4	0	0	0	0	15	1	0	0	1	0	0	0	0	2	0	1	0	0	0	0	0	0	1	1	0	0	0	1	0
131	27	0	0	1.48	45	0	0	0	0	0	0	0	0	0	1	0	5	3	0	1	0	0	0	0	9	1	1	0	2	0	0	0	0	4	1	1	0	0	0	0	0	0	2	1	0	0	0	1	0
132	60	0	0	1.58	39	0	0	0	0	0	0	0	0	0	0	1	5	5	3	3	4	5	4	4	33	0	1	2	3	0	0	3	2	11	1	1	1	1	1	1	3	4	13	1	0	0	0	0	0
133	68	0	1	1.69	51	0	0	0	0	0	0	0	1	0	1	0	3	3	1	2	3	4	3	3	22	4	2	2	4	3	5	2	3	25	4	3	4	4	3	3	3	3	27	0	0	0	1	0	0
134	61	0	1	1.65	49	0	0	0	0	0	0	0	0	0	1	0	1	0	2	2	0	0	0	1	6	2	2	3	3	2	2	3	3	20	3	3	3	4	1	1	1	2	18	1	0	0	0	3	0
135	76	0	0	1.62	42	0	0	0	0	0	0	0	0	0	1	0	4	2	3	4	3	1	1	1	19	0	1	1	2	0	0	1	1	6	0	0	2	3	0	0	1	1	7	1	0	0	0	0	0
136	60	0	0	1.58	45	0	0	0	0	0	0	0	0	0	1	0	0	0	0	2	0	0	0	0	2	0	0	0	0	0	0	0	0	0	0	0	0	0	0	0	2	2	4	1	0	0	0	0	0
137	63	0	0	1.63	60	0	0	0	0	0	0	0	1	0	1	0	2	1	2	2	3	2	3	3	18	1	1	3	3	0	1	2	3	14	1	1	2	3	3	2	3	3	18	1	0	0	0	0	0
138	77	0	1	1.5	42	0	0	0	1	0	0	0	0	0	1	0	1	1	0	2	2	2	3	0	11	3	3	2	3	1	2	2	1	17	1	3	1	3	1	0	0	2	11	1	0	0	0	1	0
139	69	0	1	1.52	41	0	0	0	0	0	0	0	1	0	1	0	3	3	3	3	2	3	2	2	21	1	1	2	4	3	3	2	3	19	3	3	3	4	3	3	2	3	24	1	0	0	0	0	0
140	46	0	0	1.59	49	0	0	0	0	0	0	0	0	0	1	0	1	0	0	0	0	2	0	0	3	1	0	0	1	0	0	1	0	3	1	0	0	0	0	0	0	0	1	1	0	0	0	1	0
141	62	0	0	1.52	40	0	0	0	0	0	0	0	0	0	1	0	2	5	4	4	3	3	0	3	24	3	3	3	4	3	3	1	2	22	2	3	3	4	3	3	2	3	23	1	0	0	0	0	0
142	75	0	0	1.56	45	0	0	0	0	0	0	0	0	0	1	0	3	2	2	3	0	1	3	1	15	2	2	2	4	0	1	3	2	16	3	1	2	4	1	2	3	1	17	1	0	0	0	0	2
143	72	0	1	1.64	50	0	0	0	0	0	0	0	0	0	1	0	4	2	1	3	0	0	3	0	13	0	3	2	3	0	0	1	1	10	2	2	1	4	0	0	4	1	14	1	0	0	0	0	0
144	45	0	0	1.58	45	0	0	0	0	0	0	0	0	0	1	0	0	3	3	4	0	0	3	3	16	0	4	0	3	0	0	4	1	12	3	4	0	2	0	0	2	1	12	1	0	0	0	1	0
145	62	0	0	1.6	59	0	0	0	0	0	0	0	0	0	1	0	1	1	1	1	0	2	3	2	11	1	0	0	0	0	0	2	2	5	1	1	0	0	0	1	1	1	5	0	0	1	0	0	0
146	55	0	0	1.61	43	0	0	0	0	0	0	0	0	0	1	0	1	0	1	2	0	0	1	1	6	0	0	1	1	0	0	1	1	4	0	0	1	1	0	0	1	1	4	0	0	1	0	0	0
147	71	0	0	1.48	35	0	0	0	0	0	0	0	0	0	1	0	0	0	0	1	0	0	0	0	1	0	0	0	0	0	0	0	0	0	0	0	0	0	0	0	0	0	0	1	0	0	0	0	0
148	75	1	1	1.6	53	0	0	1	0	0	0	0	0	1	1	0	3	4	4	5	4	4	4	4	32	3	4	3	4	1	0	0	1	16	5	5	4	4	4	3	2	2	29	1	0	0	0	1	0
149	59	0	0	1.6	48	0	0	0	0	0	0	0	0	0	1	0	2	3	0	0	0	0	1	0	6	0	1	0	1	0	0	1	1	4	1	1	0	1	0	0	1	1	5	1	0	0	0	1	0
150	74	0	0	1.48	47	0	0	0	0	0	0	0	0	0	1	0	2	3	5	3	3	3	3	5	27	2	3	0	1	2	0	5	3	16	2	3	3	2	0	3	3	3	19	1	0	0	0	0	0
151	72	0	1	1.59	59	0	0	0	0	0	0	0	0	0	1	0	4	4	4	3	1	0	3	1	20	0	0	0	1	0	0	2	0	3	1	1	0	0	0	0	2	2	6	1	0	0	0	1	0
152	75	0	0	1.53	42	0	0	0	0	0	0	0	0	0	1	0	0	1	0	0	0	0	0	0	1	0	0	0	0	0	0	0	0	0	1	0	0	0	0	0	1	1	3	1	0	0	0	2	0
153	78	0	0	1.55	34	0	0	0	0	0	0	0	0	0	1	0	0	0	0	0	0	0	0	0	0	0	0	0	0	0	0	0	0	0	0	0	0	0	0	0	1	1	2	1	0	0	0	1	0
154	39	0	1	1.62	56	0	0	0	0	0	0	0	0	0	1	0	5	5	4	4	1	4	5	4	32	3	3	3	3	3	3	4	3	25	1	2	2	4	1	0	2	2	14	1	0	0	0	1	0
155	62	0	0	1.6	45	0	0	0	0	0	0	0	0	0	0	1	3	3	2	4	3	4	4	4	27	1	1	2	2	0	0	1	1	8	2	2	1	3	1	1	1	1	12	1	0	0	0	1	0
156	70	0	0	1.5	36	0	0	0	0	0	0	0	0	0	1	0	5	1	4	5	2	2	1	2	22	1	1	2	3	1	2	1	1	12	0	1	1	2	1	1	1	1	8	1	0	0	0	0	0
157	72	0	0	1.46	40	0	0	0	0	0	0	0	0	0	1	0	5	4	3	3	3	4	4	5	31	3	3	2	3	2	2	3	3	21	3	3	3	2	3	3	4	3	24	0	0	1	0	0	0
158	57	0	0	1.65	49	0	0	0	0	0	0	0	0	0	1	0	1	3	0	5	4	1	2	3	19	1	0	0	4	0	0	0	2	7	1	0	0	2	0	0	1	1	5	1	0	0	0	1	0
159	65	0	0	1.64	48	0	0	0	0	0	0	0	0	0	1	0	3	3	2	3	1	0	0	0	12	2	3	1	3	0	1	2	2	14	1	1	0	2	1	1	1	1	8	0	0	1	0	0	0
160	61	0	0	1.48	42	0	0	0	0	0	0	0	0	0	1	0	3	2	0	3	0	0	0	1	9	2	2	0	2	0	0	2	1	9	0	2	0	0	0	0	2	2	6	1	0	0	0	0	0
161	57	0	0	1.64	43	0	0	0	0	0	0	0	0	0	1	1	2	2	3	3	0	4	3	3	20	1	0	1	1	0	0	1	1	5	1	1	0	2	0	0	2	1	7	1	0	0	0	0	0
162	68	0	0	1.6	47	0	0	0	0	0	0	0	0	0	1	0	3	0	2	5	1	1	0	4	16	0	0	1	2	2	2	2	4	13	0	1	1	1	0	2	3	1	9	1	0	0	0	0	0
163	72	0	1	1.63	40	0	0	1	0	0	0	0	0	0	1	0	2	3	0	2	1	0	1	3	12	1	1	0	0	0	0	3	1	6	1	1	0	0	0	0	3	3	8	1	0	0	0	1	1
164	57	1	0	1.72	62	0	0	0	0	0	0	0	0	0	1	0	1	1	1	1	0	0	0	2	6	0	1	1	0	0	0	1	1	4	0	0	0	0	0	0	1	1	2	1	0	0	0	1	0
165	64	0	0	1.57	43	0	0	0	0	0	0	0	0	0	1	0	1	1	1	3	0	0	4	1	11	1	1	1	1	1	0	2	0	7	1	1	0	0	0	1	0	1	4	1	0	0	0	1	0
166	77	1	0	1.72	55	0	0	0	0	0	0	0	0	0	0	1	2	1	0	0	0	0	1	1	5	1	1	1	1	1	1	3	3	12	3	3	1	1	1	1	1	2	13	0	0	1	0	1	1
167	26	1	0	1.68	63	0	0	0	0	0	0	0	0	0	1	0	2	2	0	0	0	0	0	0	4	0	0	0	0	0	0	0	0	0	0	0	0	0	0	0	0	0	0	0	1	0	0	1	0
168	82	0	0	1.4	36	0	0	0	0	0	0	0	1	0	1	0	4	2	1	1	0	0	2	1	11	3	3	2	2	1	1	1	3	16	2	2	3	2	0	0	1	1	11	0	0	0	1	0	0
169	37	0	0	1.56	47	0	0	0	0	0	0	0	0	0	1	0	0	0	0	1	0	0	0	0	1	0	0	0	0	0	0	0	1	1	0	0	0	1	0	0	0	0	1	0	0	1	0	1	0
170	82	0	0	1.59	49	0	0	0	0	0	0	0	1	0	1	0	2	3	0	0	0	0	1	2	8	3	0	3	4	5	4	2	4	25	3	0	0	3	2	1	1	0	10	0	0	1	0	0	0
171	79	0	0	1.49	43	0	0	0	0	0	0	0	0	0	1	0	0	0	0	1	0	0	1	0	2	0	0	0	1	0	0	0	1	2	0	0	0	1	0	0	1	1	3	1	0	0	0	0	0
172	75	0	1	1.55	44	0	0	0	0	0	0	0	0	1	0	1	0	0	0	0	0	0	0	0	0	0	0	0	1	0	0	0	0	1	0	0	0	0	0	0	0	0	0	0	0	1	0	0	0
173	74	0	0	1.46	41	0	0	0	0	0	0	0	0	0	1	0	1	1	0	0	0	0	5	3	10	0	1	0	0	0	0	0	2	3	0	0	0	0	1	0	4	4	9	1	0	0	0	0	0
174	56	0	1	1.59	53	0	0	1	0	0	0	0	0	0	1	0	4	2	1	0	0	0	0	0	7	1	1	0	1	0	1	1	1	6	0	0	1	1	0	0	2	1	5	0	0	1	0	0	0
175	44	0	1	1.65	68	0	0	0	0	0	0	0	0	0	1	0	1	0	0	1	0	0	0	1	3	1	0	1	1	0	0	1	1	5	0	0	0	0	0	0	1	1	2	0	0	1	0	1	0
176	76	0	0	1.5	40	0	0	0	0	0	0	0	0	0	1	0	2	1	3	4	0	3	3	4	20	0	2	5	5	0	2	4	4	22	0	1	3	5	3	0	3	3	18	0	0	1	1	3	0
177	52	0	0	1.56	45	0	0	0	0	0	0	0	0	0	1	0	3	3	3	3	0	0	0	0	12	2	2	3	2	2	2	1	1	15	1	2	1	1	0	0	0	0	5	1	0	0	0	1	0
178	80	0	0	1.55	35	0	0	0	0	0	0	0	0	0	1	0	1	3	2	4	1	1	1	4	17	0	4	1	3	1	3	5	2	19	1	2	3	4	3	4	4	3	24	0	0	1	0	1	0
179	59	0	0	1.62	52	0	0	0	0	0	0	0	0	0	0	1	1	0	1	1	0	0	1	0	4	3	0	0	1	0	0	3	1	8	2	0	2	2	0	0	2	2	10	1	0	0	0	0	0
[truncated: 38 more columns]
